# Supplementary material
Source: Springer Nature journal article supplement (https://www.springermedizin.de/resource/supplementary/13053_2009_140_MOESM1_ESM.pdf/9674280)
Supplement: MOESM1 [file 9674280]

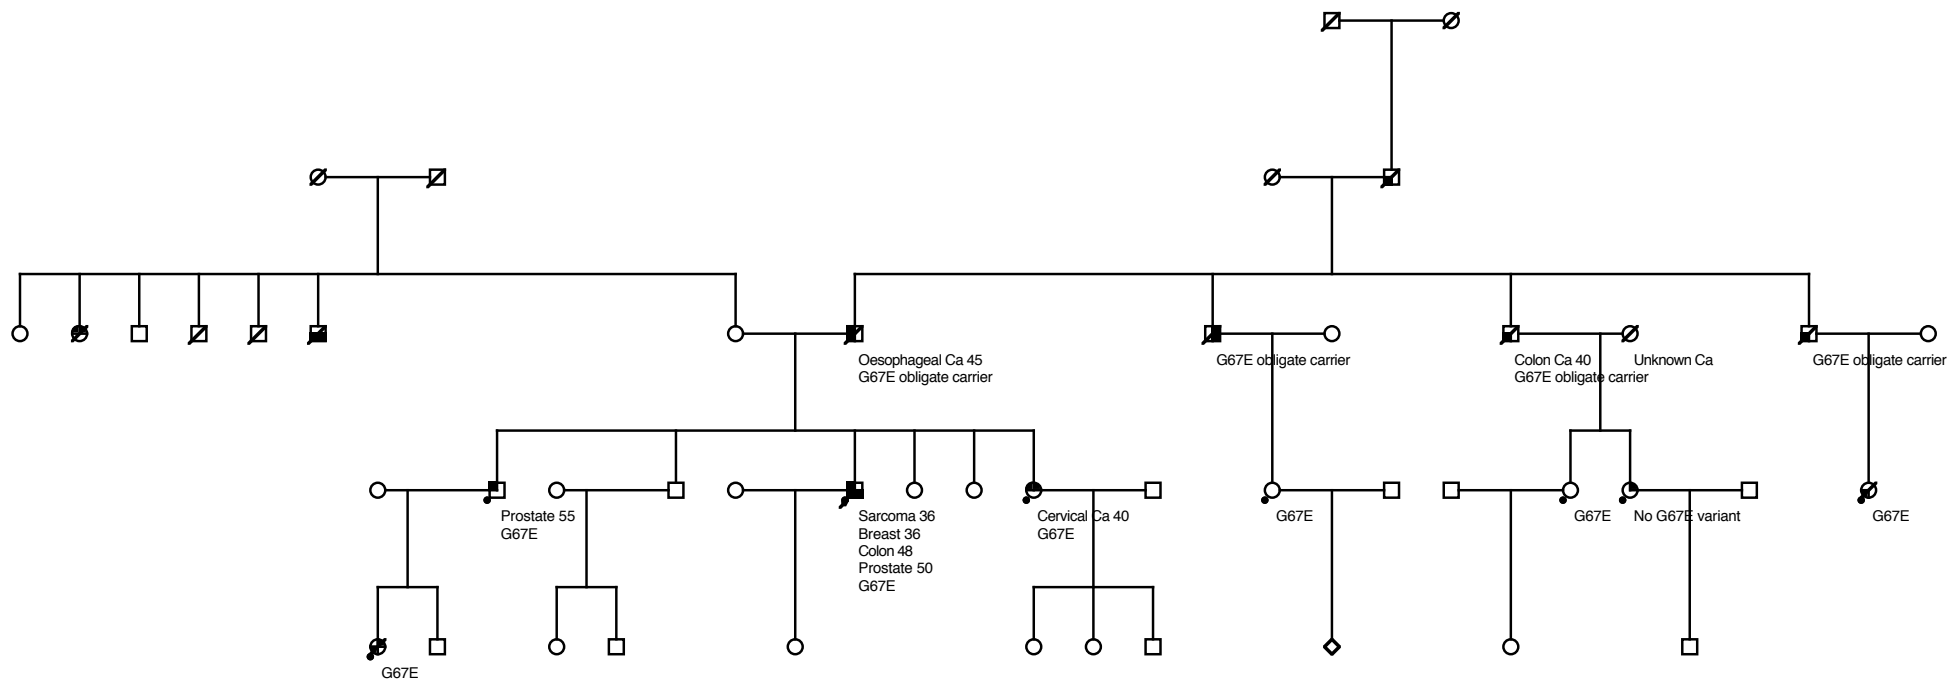

| Legend            |                      |                             |
|-------------------|----------------------|-----------------------------|
| □ Male            | ○ Female             | ◇ Unknown                   |
| ● Breast Cancer   | ■ Oesophageal Cancer | ■ Multiple tumours          |
| ■ Prostate Cancer | ■ Lung Cancer        | ⊘ Deceased                  |
| ■ Colon Cancer    | ■ Liver Cancer       | □ Proband                   |
| ● Cervical Cancer | ● Glioma             | ○ Undergone genetic testing |
